# Supplementary material for: A zwitterionic polymer as an interfacial layer for efficient and stable perovskite solar cells
Source: Royal Society of Chemistry journal article supplement (doi:10.1039/c9ra04907j), 2019-01-01
Supplement: c9ra04907j1.pdf [file c9ra04907j1.pdf]

## Supporting information

### **Zwitterionic Polymer as an Interfacial Layer for Efficient and Stable Perovskite Solar Cells**

Suyuan Zhou,<sup>1,#</sup> Tao Zhu,<sup>1,#</sup> Luyao Zheng,<sup>1</sup> Dong Zhang,<sup>3</sup> Wenzhan Xu,<sup>1</sup> Lei Liu,<sup>1</sup> Gang Cheng,<sup>2,\*</sup> Jie Zheng,<sup>3,\*</sup> and Xiong Gong<sup>1,\*</sup>

- 1) Department of Polymer Engineering, The University of Akron, Akron, OH 44325, USA
- 2) Department of Chemical Engineering, University of Illinois at Chicago, Chicago, IL 60607, USA
- 3) Department of Chemical and Biomedical Engineering, The University of Akron, Akron, OH 44325, USA

**SI 1. The absorption spectrum of the Dex-CB-MA thin film**

**SI 2: Atomic force microscopy images of the Dex-CB-MA thin films**

**SI 3: The photocurrent hysteresis of perovskite solar cells**

**SI 4: The stability of perovskite solar cells testing in air**

### SI 1. The absorption spectrum of the Dex-CB-MA thin film

Fig. S1 shows the UV-visible absorption spectrum of Dex-CB-MA thin film. The optical bandgap is estimated to be 3.4 eV, according to  $E_g = 1240 / \lambda_{\text{edge}}$ ,<sup>1</sup> where  $E_g$  is bandgap of Dex-CB-MA and  $\lambda_{\text{edge}}$  is absorption edge. The bandgap estimated by absorption spectrum is consistent well with the bandgap from HOMO and LUMO energy levels.

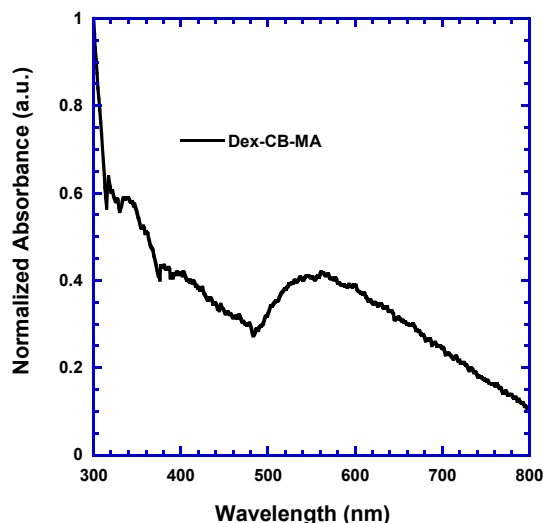

Fig. S1 UV-visible absorption spectrum of the Dex-CB-MA thin film.

### SI 2: Atomic force microscopy images of the Dex-CB-MA thin films

Fig. S2 shows the atomic force microscopy (AFM) images of the Dex-CB-MA thin films on the top of PEDOT:PSS thin layer. The thicknesses of the Dex-CB-MA thin films were tuned by spin-speeds. The surface roughness was tested by the software for the whole testing area ( $5\mu\text{m}\times 5\mu\text{m}$ ). Roughness and thickness of Dex-CB-MA thin layers were summarized in Table S1. The thicknesses of Dex-CB-MA thin films were decreased while the roughness increased with the high spin-speed. The high-speed during spin-coating process caused a thin thickness of the Dex-CB-MA thin films, which could not cover the PEDOT:PSS layers entirely, so it made no

contributions to smoothing the PEDOT:PSS surface. On the contrary, the Dex-CB-MA layer of 1 nm increased the roughness of the PEDOT:PSS/Dex-CB-MA hole extraction layer. As the thickness of the Dex-CB-MA thin films gradually increased, the surface of PEDOT:PSS layer was modified and smoother the PEDOT:PSS/Dex-CB-MA HTLs could be expected.

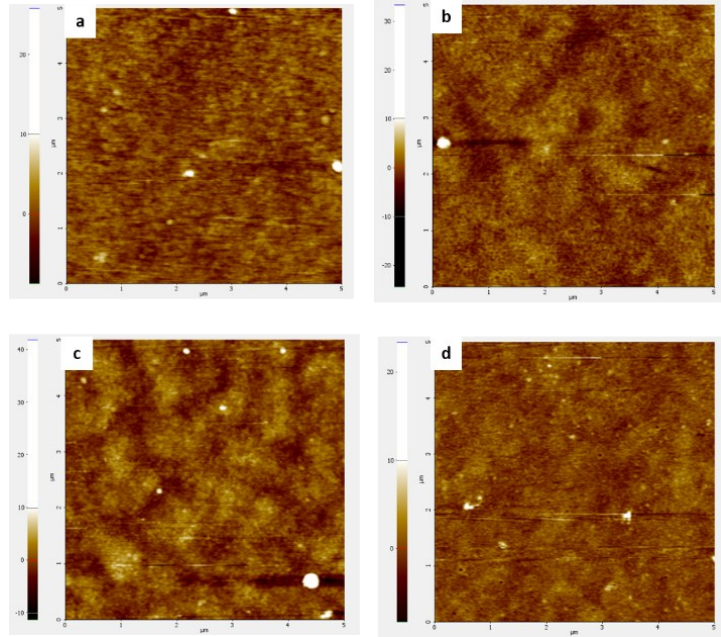

**Fig. S2.** AFM images of the surfaces of (a) PEDOT:PSS (b) PEDOT:PSS/Dex-CB-MA (5 nm), (c) PEDOT:PSS/Dex-CB-MA (2 nm), (d) PEDOT:PSS/Dex-CB-MA (1 nm).

**Table S1.** Roughness and thickness of Dex-CB-MA on PEDOT:PSS obtained from different spin rate.

| Spin-speed (RPM) | RMS roughness (nm) | Thickness (nm) |
|------------------|--------------------|----------------|
| 0                | 1.645              | 0              |
| 1500             | 1.405              | 5              |
| 2500             | 3.042              | 2              |
| 3500             | 4.310              | 1              |

### SI 3: The photocurrent hysteresis of perovskite solar cells

The hysteresis index can be calculated by the equation:  $HI = (PCE_{reverse} - PCE_{forward}) / PCE_{reverse}$ . At the scan rate of 0.5 V/s, the PSCs fabricated on PEDOT:PSS HTL possesses a HI of 0.098; whereas the PSCs fabricated on PEDOT:PSS/ DEX-CB-MA HTL possesses a HI of 0.049. Two times lower HI values indicate that the DEX-CB-MA plays a positive role in thin-film interface modification.

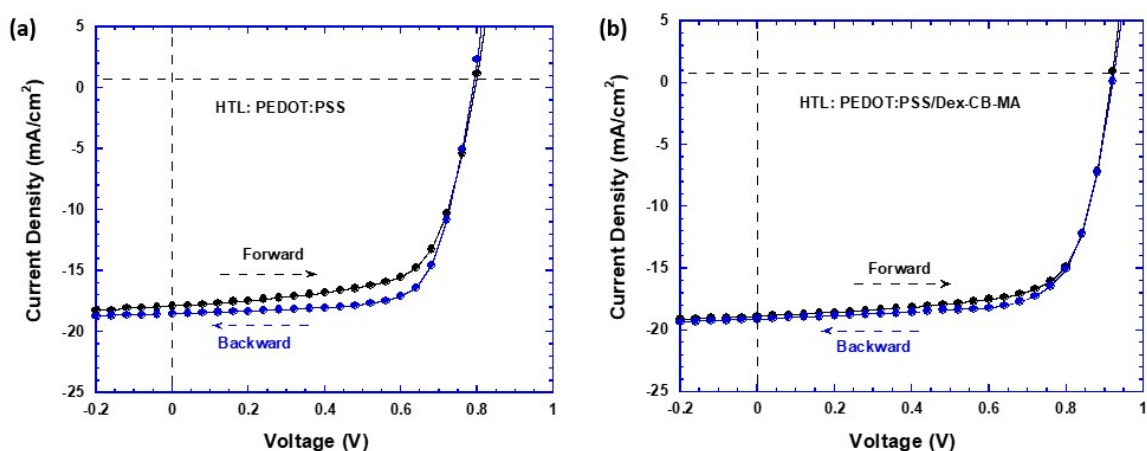

**Fig. S3** The J-V characteristics of studied PSCs under different scanning direction. Scanning rate: 0.5 V/s

**Table S2.** The performance of studied PSCs under different scanning direction

| Studied HTL         | Direction | $V_{oc}$ (V) | $J_{sc}$ (mA/cm <sup>2</sup> ) | FF (%) | PCE (%) | Hysteresis index |
|---------------------|-----------|--------------|--------------------------------|--------|---------|------------------|
| PEDOT:PSS           | Forward   | 0.80         | 17.88                          | 66.0   | 9.44    | 0.098            |
|                     | Backward  | 0.80         | 18.51                          | 70.7   | 10.46   |                  |
| PEDOT:PSS/Dex-CB-MA | Forward   | 0.92         | 18.87                          | 70.2   | 11.85   | 0.049            |
|                     | Backward  | 0.92         | 19.11                          | 70.9   | 12.47   |                  |

#### **SI 4: The stability of perovskite solar cells testing in air**

Fig. S5 presents the stability of PSCs with the PEDOT:PSS HEL and the PEDOT:PSS/ Dex-CB-MA HEL, respectively, where PSCs are unencapsulated and tested in air. It is clear that after 6 days, PCE of PSCs with the PEDOT:PSS/Dex-CB-MA HEL drops to 90% value of its initial value, but PSCs with the PEDOT:PSS HEL does not work at all. Thus, introduction of Dex-CB-MA interfacial layer can efficiently enhance the stability of PSCs.

In order to understand enhanced device stability, perovskite thin-film upon the PEDOT:PSS HTL the the PEDOT:PSS/Dex-CB-MA were tested in air. As presented in Fig. S5, the perovskite thin-film upon PEDOT:PSS HTL decay to  $\text{PbI}_2$  after 2 weeks, but the thin film upon PEDOT:PSS/Dex-CB-MA only loss 20% absorption in the visible region. These results indicate that the perovskite thin-film upon PEDOT:PSS possess a faster decay compared to that upon PEDOT:PSS/Dex-CB-MA, due to the cross-linkable ability of zwitterionic polymer Dex-CB-MA.

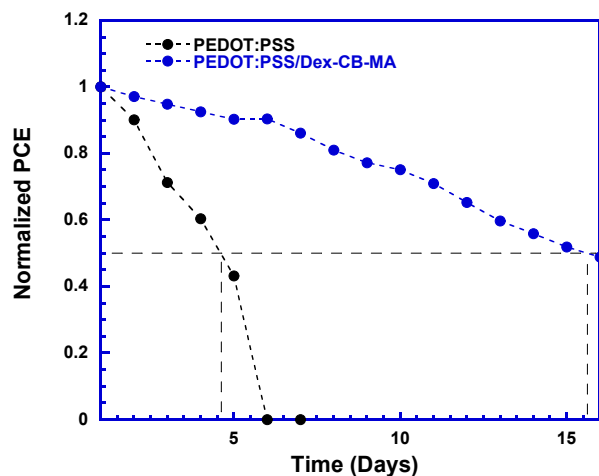

**Fig. S4.** The stability of PSCs with the PEDOT:PSS HEL and the PEDOT:PSS/ Dex-CB-MA HEL, respectively, where PSCs are unencapsulated and tested in air.

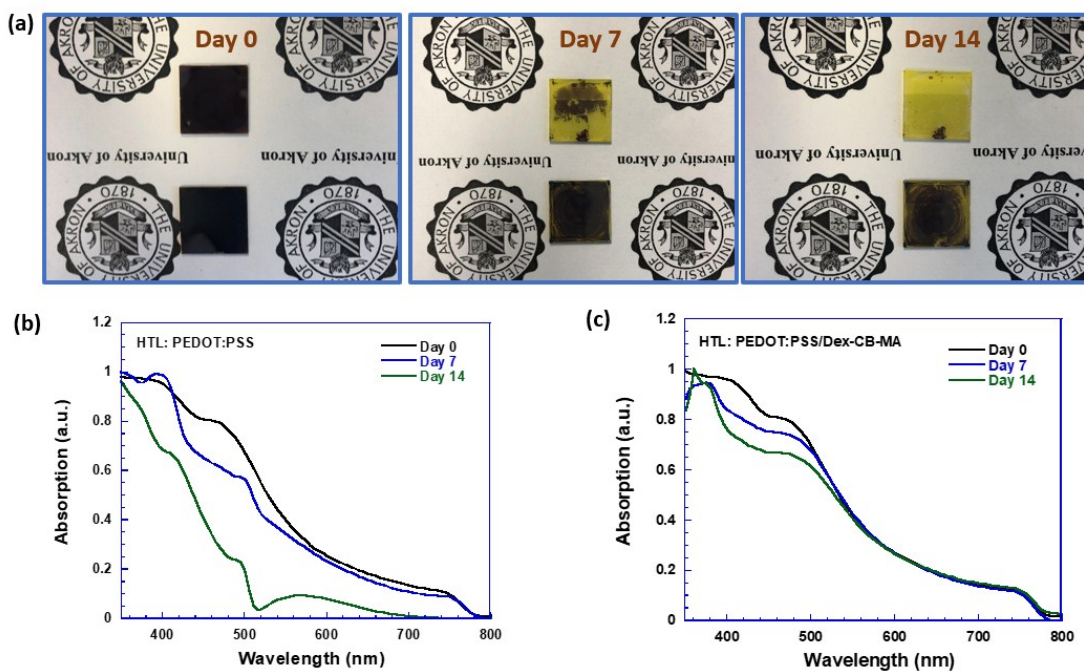

**Fig. S5.** (a) The images of decay process of perovskite thin films upon the PEDOT:PSS HEL (Top three) and the PEDOT:PSS/Dex-CB-MA HEL (Bottom three). The absorption spectra of perovskite thin film upon (b) the PEDOT:PSS HEL and (c) the PEDOT:PSS/Dex-CB-MA.

## Notes and references

1. L. Leonat, G. Sbârcea and I. V. Branțoi, *UPB Sci. Bull. Ser. B Chem. Mater. Sci.* 2013, **75**, 111–118.
2. K.-L. Zhang, C.-M. Liu, F.-Q. Huang, C. Zheng and W.-D. Wang, *Appl. Catal. B Environ.* 2006, **68**, 125–129.
